# Supplementary material for: Stabilisation of molecular TiO4 species on the pore surface of mesoporous silica for photocatalytic H2 evolution
Source: Royal Society of Chemistry journal article supplement (doi:10.1039/d4dt01610f), 2024-01-01
Supplement: d4dt01610f1.pdf [file d4dt01610f1.pdf]

## Supplementary information

### **Stabilisation of molecular TiO<sub>4</sub> species on the pore surface of mesoporous silica for photocatalytic H<sub>2</sub> evolution**

Hikaru Inada, Masashi Morita\* and Kazuyuki Maeda\*

*Department of Applied Chemistry, Graduate School of Engineering, Tokyo University of Agriculture and Technology, 2-24-16 Naka-cho, Koganei, Tokyo 184-8588, Japan.*

Correspondence and requests for materials should be addressed to M. M. and K. M. (E-mail: m-morita@go.tuat.ac.jp and k-maeda@cc.tuat.ac.jp).

## ***Contents***

|                                                                                                                                                                              |            |
|------------------------------------------------------------------------------------------------------------------------------------------------------------------------------|------------|
| <b>Experimental section</b>                                                                                                                                                  | <b>S3</b>  |
| <b>Fig. S1</b> BJH pore size distributions of SBA-15, TiO(acac)-SBA(5) and Ti-SBA(5)-w.                                                                                      | <b>S4</b>  |
| <b>Fig. S2</b> BJH pore size distributions of SBA-15, TiO(acac)-SBA(10)<br>and Ti-SBA(10)-w.                                                                                 | <b>S5</b>  |
| <b>Fig. S3</b> BJH pore size distributions of SBA-15, TiO(acac)-SBA(25)<br>and Ti-SBA(25)-w.                                                                                 | <b>S6</b>  |
| <b>Fig. S4</b> SEM images and EDX elemental map of TiO(acac)-SBA(25).                                                                                                        | <b>S7</b>  |
| <b>Fig. S5</b> SEM images and EDX elemental map of Ti-SBA(25)-w.                                                                                                             | <b>S8</b>  |
| <b>Fig. S6</b> TG-DTA curves of TiO(acac)-SBA(5) and Ti-SBA(5)-w.                                                                                                            | <b>S9</b>  |
| <b>Fig. S7</b> TG-DTA curves of TiO(acac)-SBA(10) and Ti-SBA(10)-w.                                                                                                          | <b>S10</b> |
| <b>Fig. S8</b> TG-DTA curves of TiO(acac)-SBA(25) and Ti-SBA(25)-w.                                                                                                          | <b>S11</b> |
| <b>Fig. S9</b> FT-IR spectra of TiO(acac) <sub>2</sub> , P25, SBA-15, TiO(acac)-SBA(5), Ti-SBA(5)-w,<br>TiO(acac)-SBA(10), Ti-SBA(10)-w, TiO(acac)-SBA(25) and Ti-SBA(25)-w. | <b>S12</b> |
| <b>Fig. S10</b> Solid-state <sup>29</sup> Si MAS NMR spectra of SBA-15 and Ti-SBA(25)-w.                                                                                     | <b>S13</b> |
| <b>Fig. S11</b> Cycling performance of Ti-SBA(25)-w for photocatalytic H <sub>2</sub> evolution from aqueous<br>methanol solution.                                           | <b>S14</b> |
| <b>Table S1.</b> H <sub>2</sub> evolution from aqueous methanol solution using different photocatalysts.                                                                     | <b>S15</b> |
| <b>Supporting References</b>                                                                                                                                                 | <b>S16</b> |

## **Experimental section**

### **Chemicals**

Hexadecyltrimethylammonium bromide (C<sub>16</sub>TMABr) was purchased from FUJIFILM Wako Pure Chemical Corp. Tetramethylammonium hydroxide aqueous solution (25 wt%) and titanium tetraisopropoxide were purchased from Tokyo Chemical Industry Co. Fumed silica (Cab-O-Sil M5) was purchased from Inoxia Ltd.

### **Synthesis of Ti-MCM-41**

Ti-containing mesoporous silica (Ti-MCM-41), used as a reference photocatalyst, was hydrothermally synthesized according to the literature.<sup>S1</sup> The incorporated Ti-oxo species existed as isolated tetrahedral coordination in the framework of MCM-41. Deionised water (25 mL) was mixed with C<sub>16</sub>TMABr (3.4 g) and the mixture was magnetically stirred overnight until the solution was homogenised. Tetramethylammonium hydroxide aqueous solution (2.2 g), fumed silica (1.4 g), and titanium tetraisopropoxide (120 µL) were then added into the solution and stirred at room temperature for 1.5 h. The mixture was transferred to the teflon-lined autoclave (50 mL) and hydrothermally treated at 135 °C for 14 h. After cooling to room temperature, the solid was collected by centrifugation at 4000 rpm for 6 min and washed five times with deionised water. The obtained sample was dried at 60 °C overnight and then calcined in air at 550 °C for 6 h.

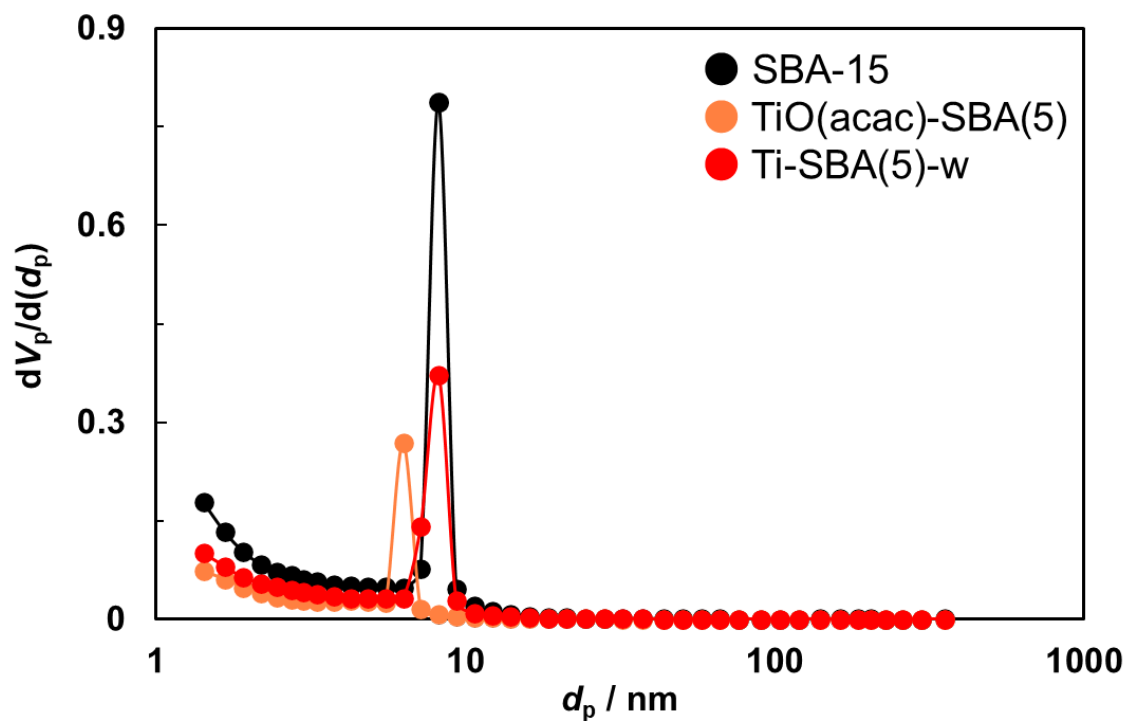

Fig. S1 BJH pore size distributions of SBA-15, TiO(acac)-SBA(5) and Ti-SBA(5)-w.

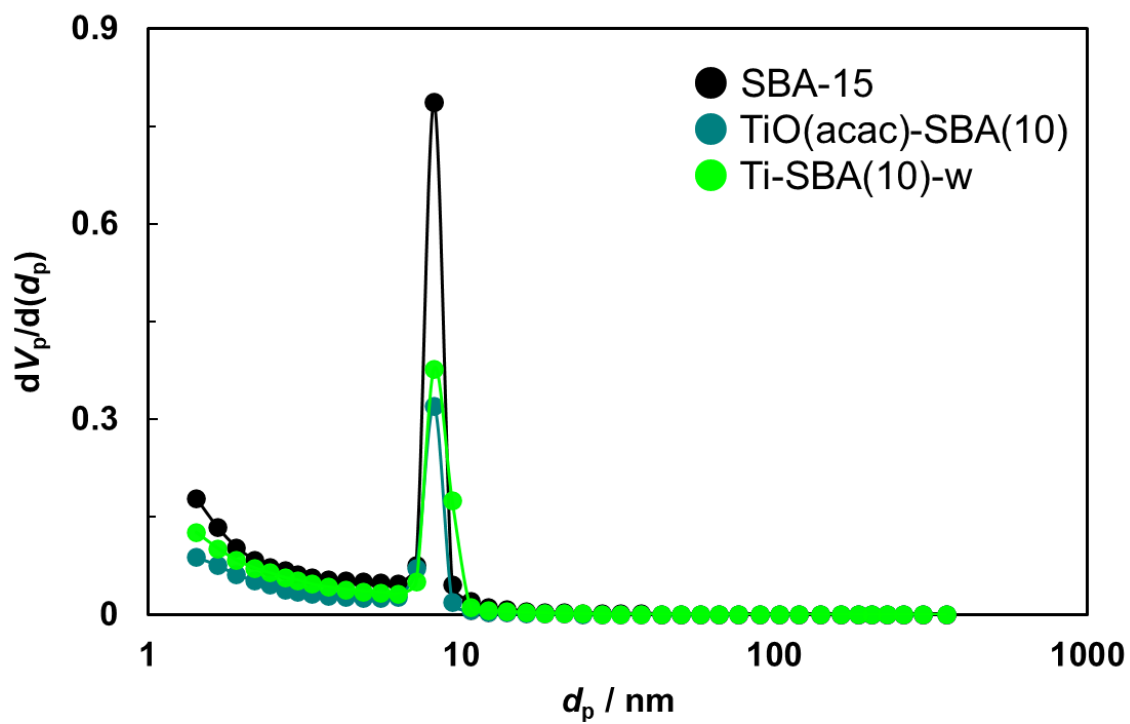

Fig. S2 BJH pore size distributions of SBA-15, TiO(acac)-SBA(10) and Ti-SBA(10)-w.

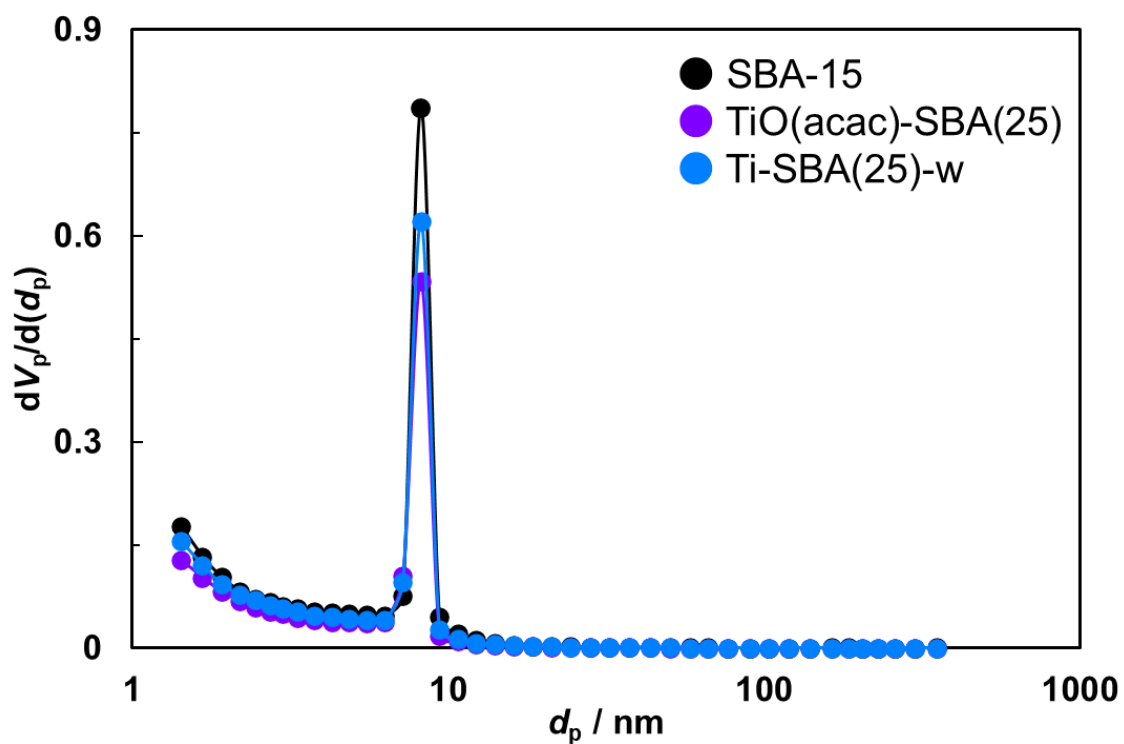

Fig. S3 BJH pore size distributions of SBA-15, TiO(acac)-SBA(25) and Ti-SBA(25)-w.

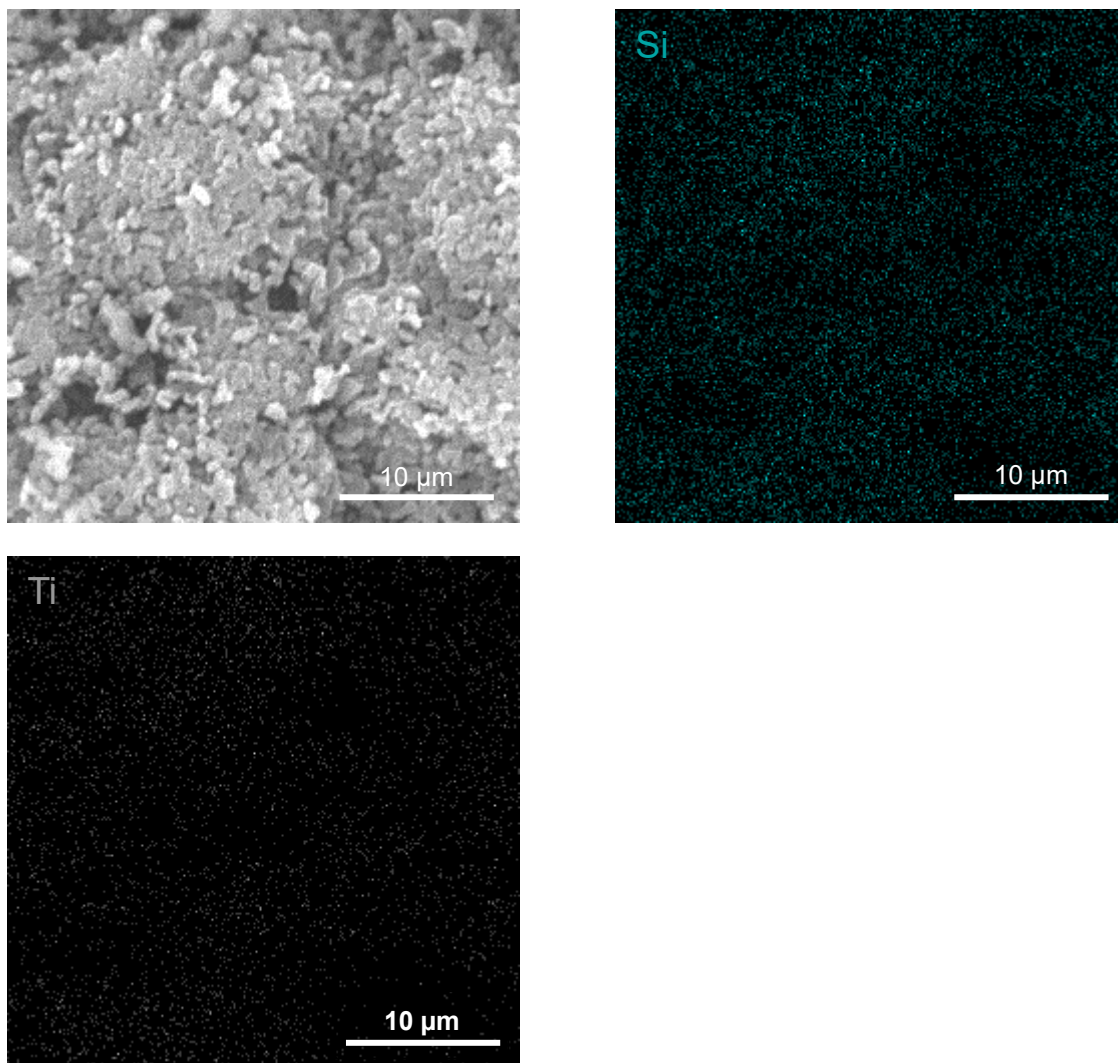

**Fig. S4** SEM images and EDX elemental map of TiO(acac)-SBA(25).

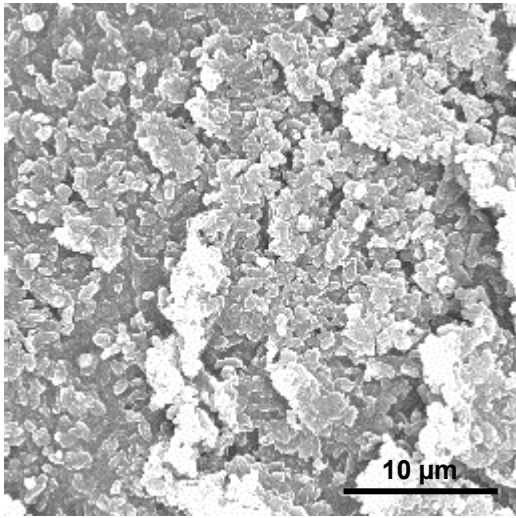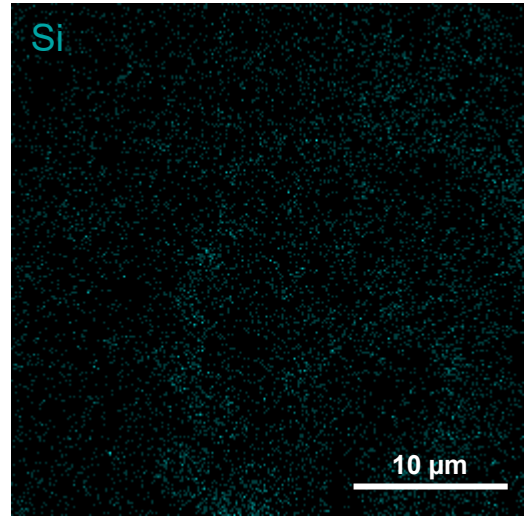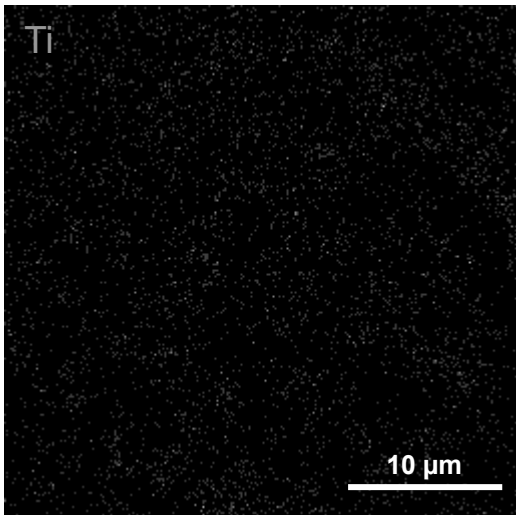

**Fig. S5** SEM images and EDX elemental map of Ti-SBA(25)-w.



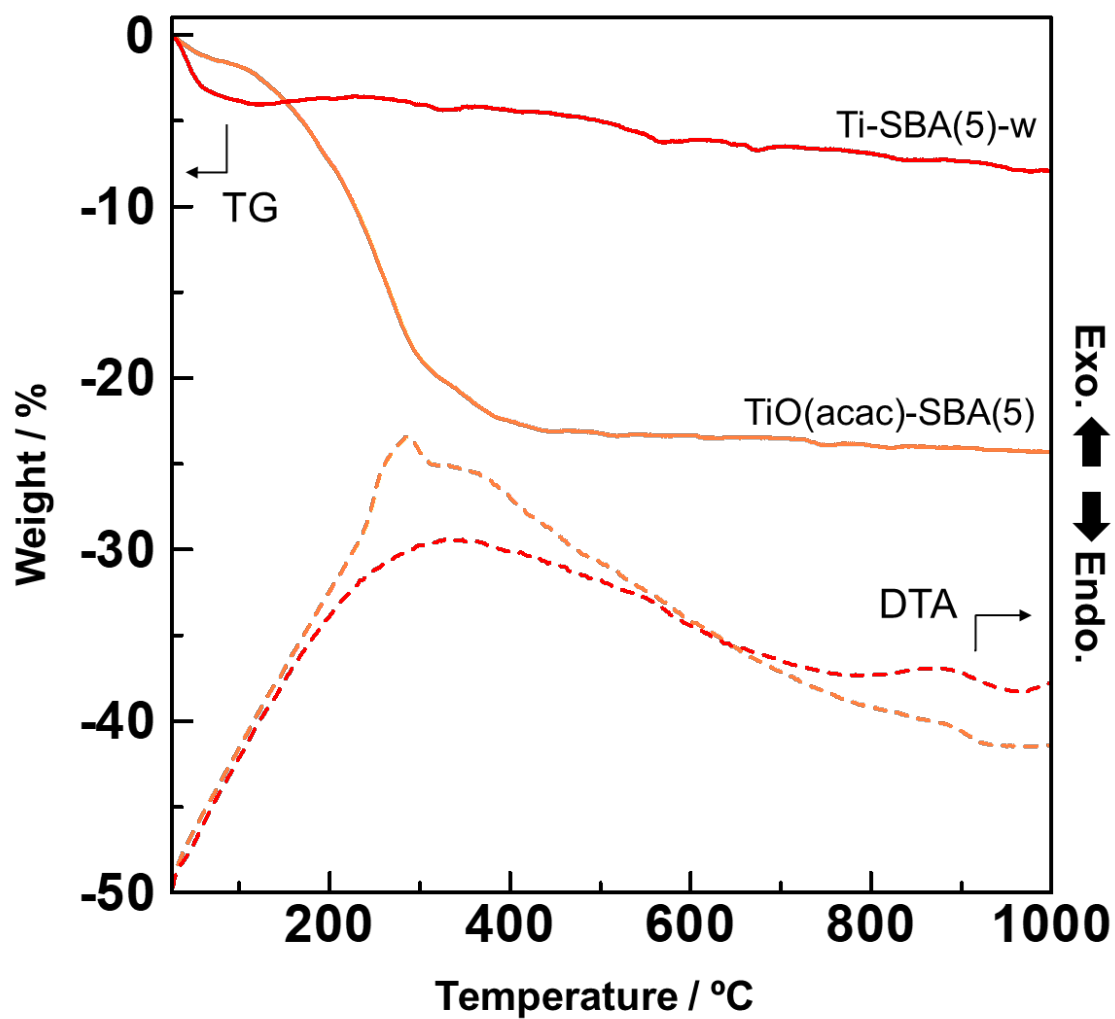

Fig. S6 TG-DTA curves of TiO(acac)-SBA(5) and Ti-SBA(5)-w.

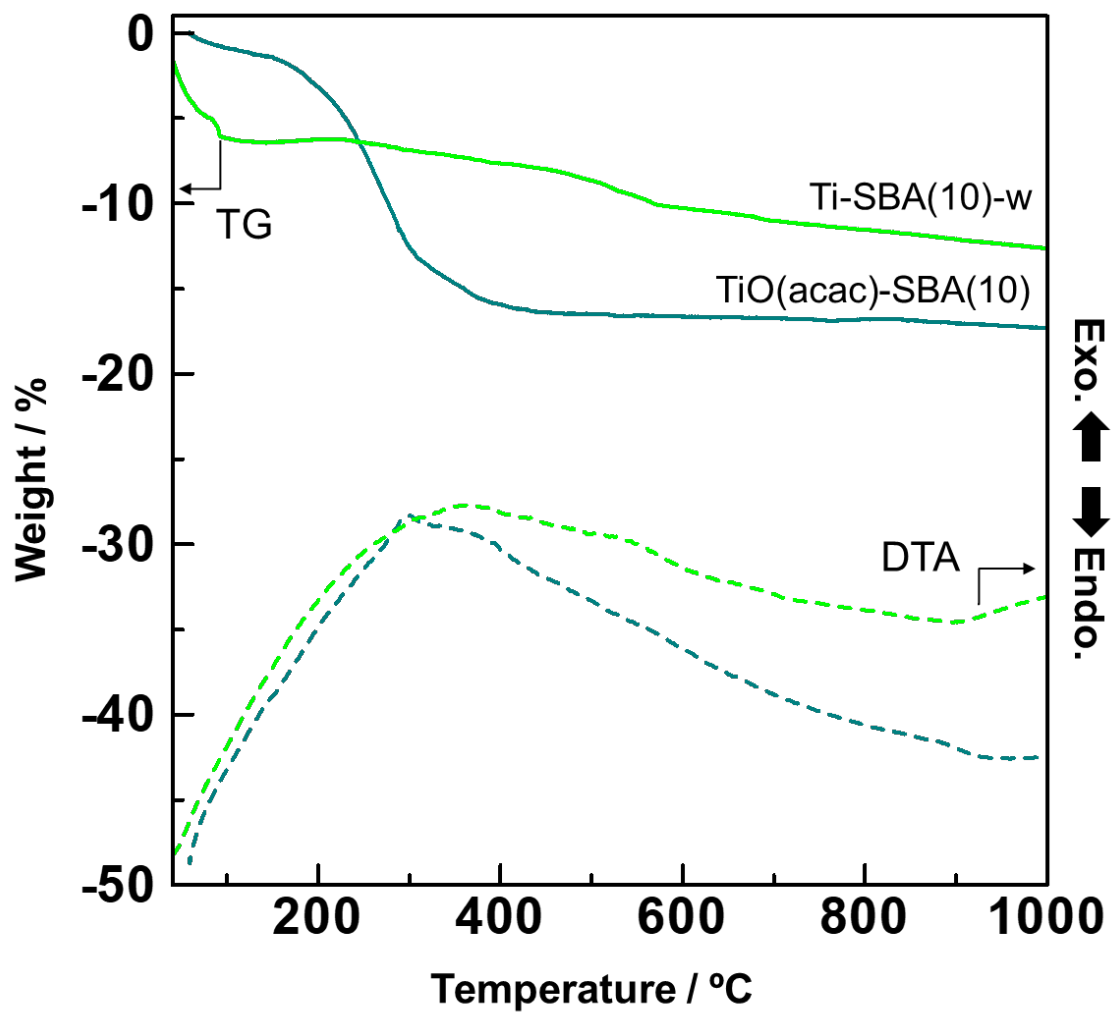

Fig. S7 TG-DTA curves of TiO(acac)-SBA(10) and Ti-SBA(10)-w.

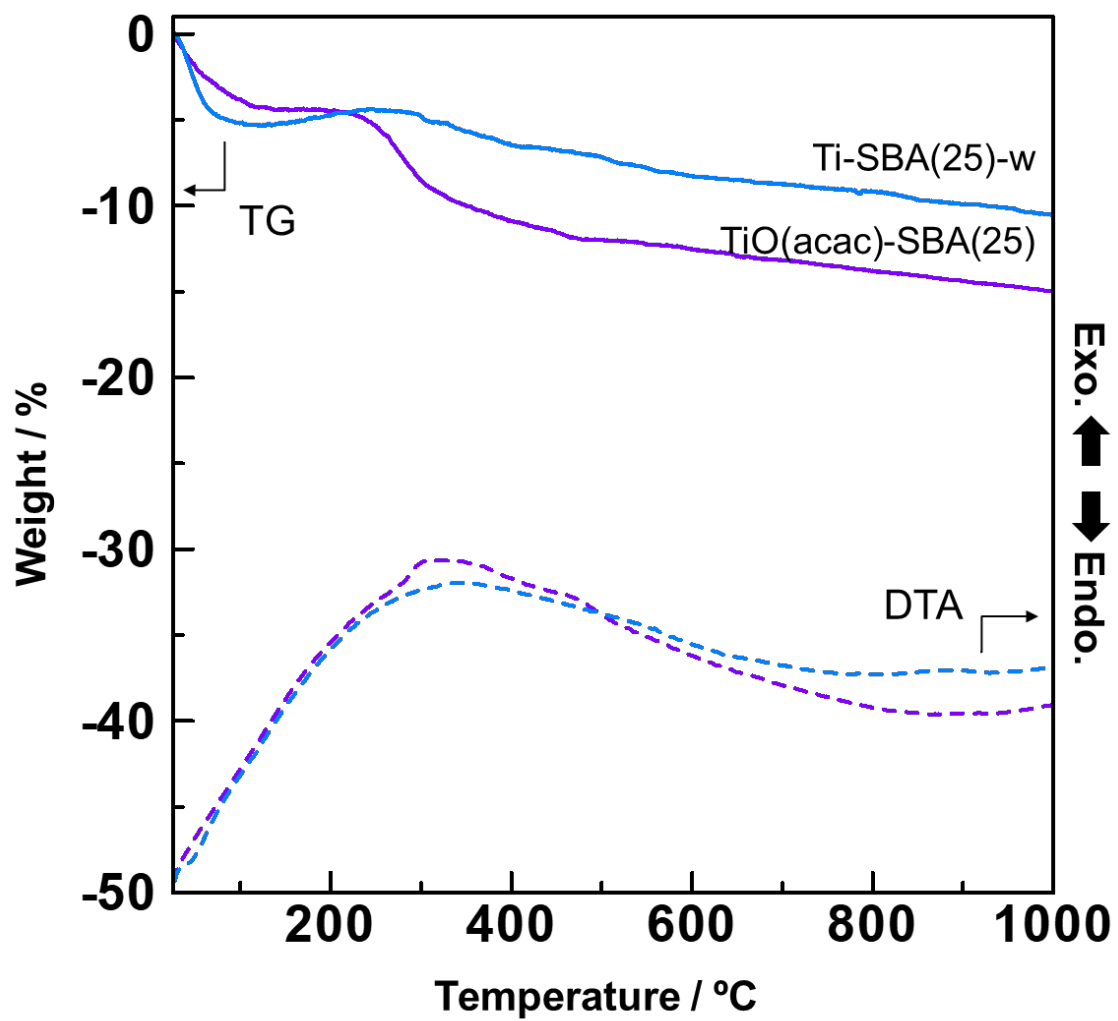

Fig. S8 TG-DTA curves of TiO(acac)-SBA(25) and Ti-SBA(25)-w.

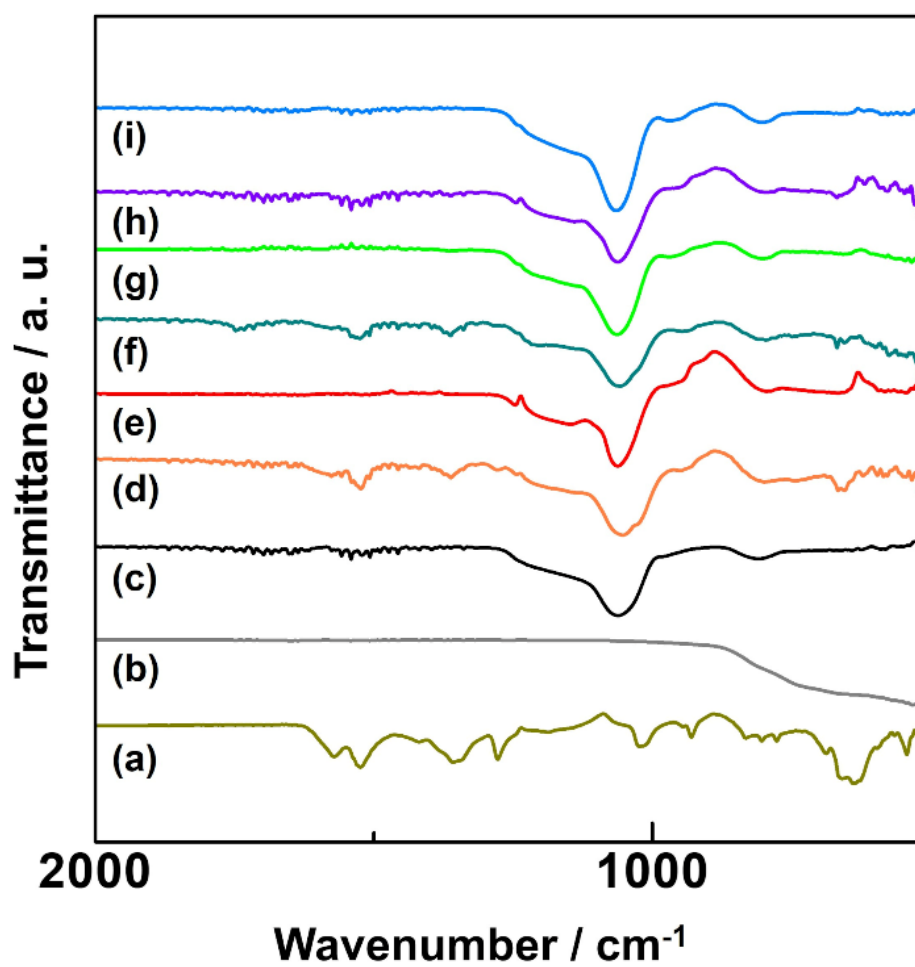

**Fig. S9** FT-IR spectra of (a) TiO(acac)<sub>2</sub>, (b) P25, (c) SBA-15, (d) TiO(acac)-SBA(5), (e) Ti-SBA(5)-w, (f) TiO(acac)-SBA(10), (g) Ti-SBA(10)-w, (h) TiO(acac)-SBA(25) and (i) Ti-SBA(25)-w.

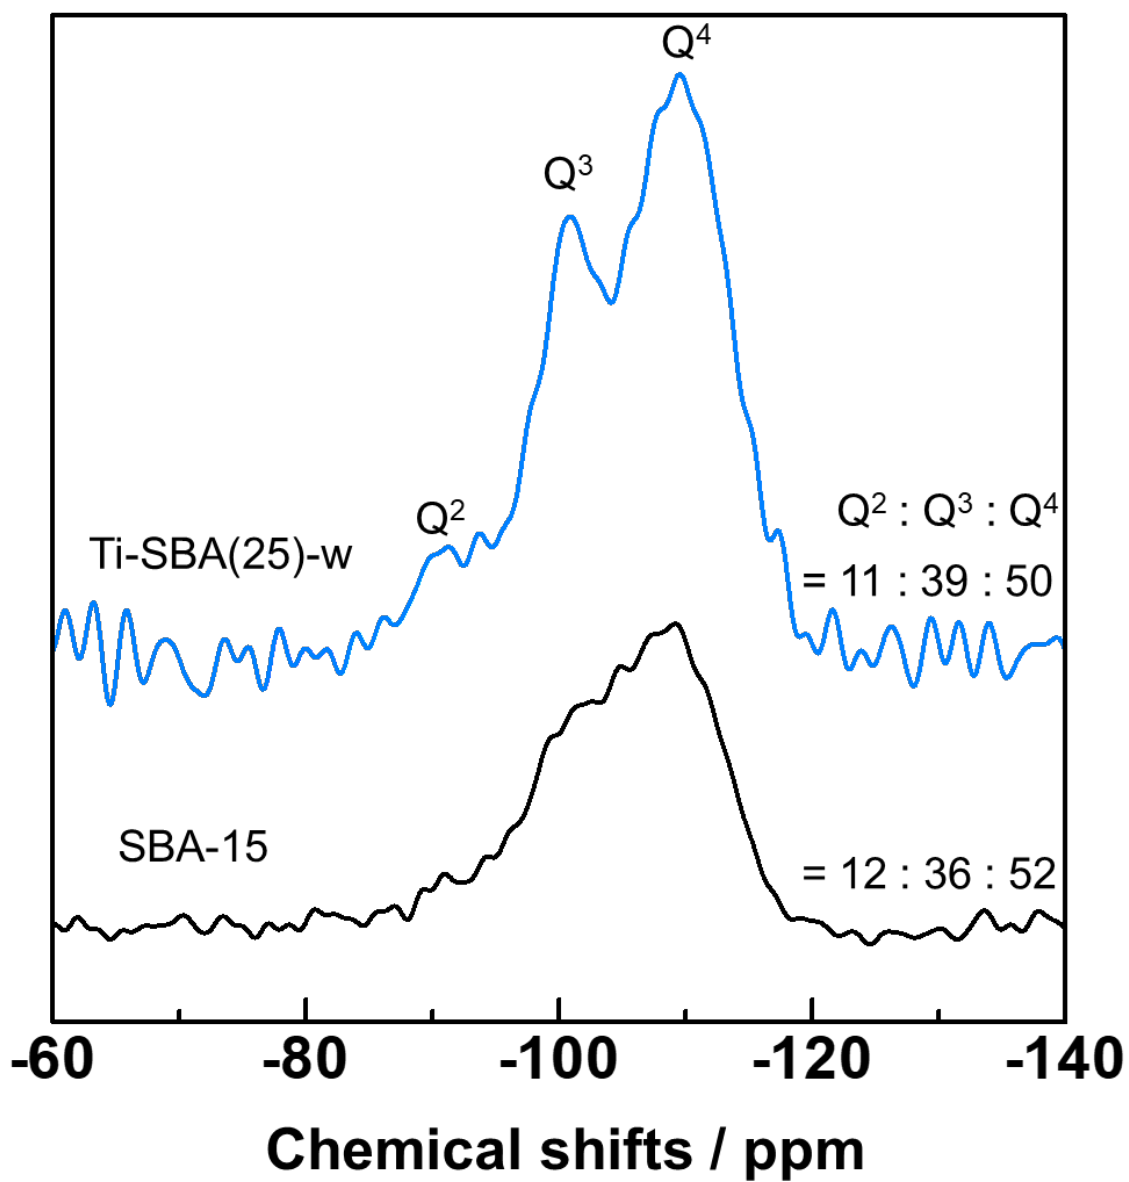

**Fig. S10** Solid-state  $^{29}\text{Si}$  MAS NMR spectra of SBA-15 and Ti-SBA(25)-w. The integral  $\text{Q}^2$ ,  $\text{Q}^3$  and  $\text{Q}^4$  signal ratios are shown on the right.

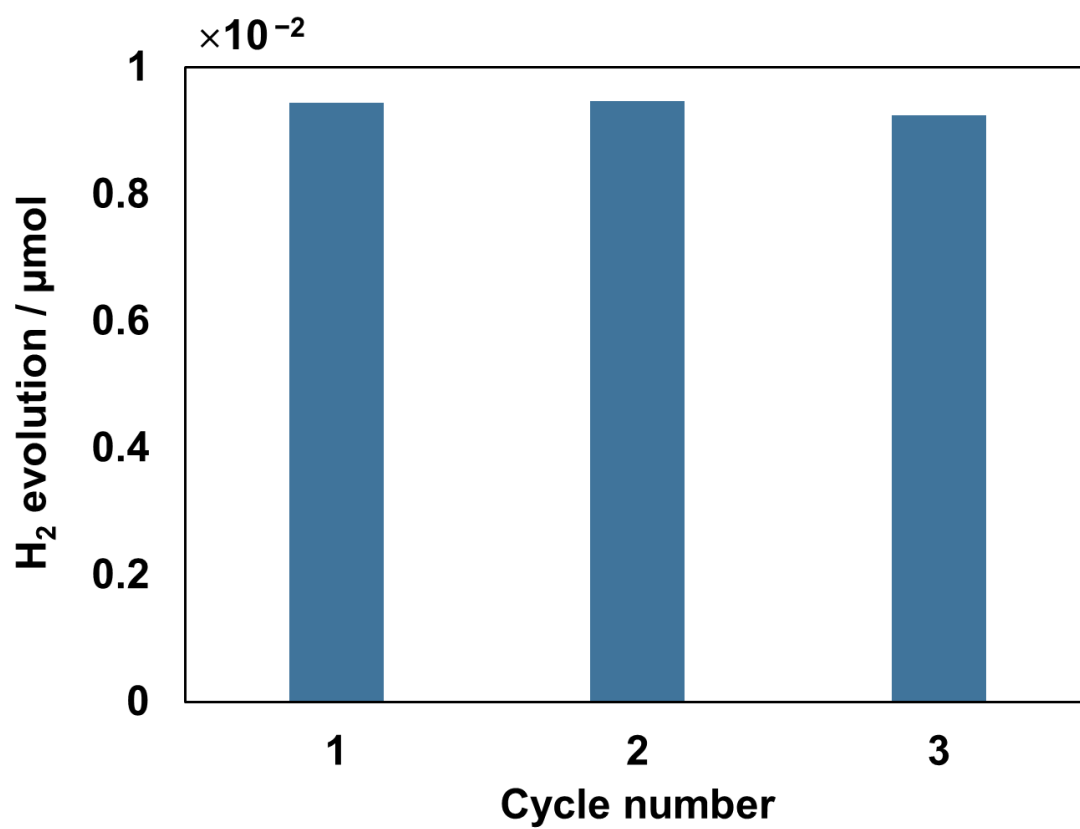

**Fig. S11** Cycling performance of Ti-SBA(25)-w for photocatalytic H<sub>2</sub> evolution from aqueous methanol solution.

**Table S1** H<sub>2</sub> evolution from aqueous methanol solution using different photocatalysts

| <b>Sample</b>       | <b>Si/Ti<sup>a</sup><br/>ratio</b> | <b>TiO<sub>2</sub> amount<br/>/ wt%</b> | <b>H<sub>2</sub> evolution (2 h)<br/>/ μmol</b> | <b>TOF<sup>b</sup><br/>/ h<sup>-1</sup></b> |
|---------------------|------------------------------------|-----------------------------------------|-------------------------------------------------|---------------------------------------------|
| <b>Ti-SBA(5)-w</b>  | 45                                 | 2.9                                     | 0.014                                           | 0.0013                                      |
| <b>Ti-SBA(10)-w</b> | 64                                 | 2.0                                     | 0.0098                                          | 0.00038                                     |
| <b>Ti-SBA(25)-w</b> | 120                                | 1.1                                     | 0.012                                           | 0.0028                                      |
| <b>SBA-15</b>       | –                                  | –                                       | n. d.                                           | –                                           |
| <b>Ti-MCM-41</b>    | 120                                | 1.1                                     | 0.0054                                          | 0.0013                                      |
| <b>P25</b>          | –                                  | 100                                     | 0.0039                                          | 0.000010                                    |

<sup>a</sup> Calculated from SEM-EDX. <sup>b</sup> Turnover frequency (TOF, h<sup>-1</sup>) was calculated from the following formula: TOF = [H<sub>2</sub> evolution rate (mol h<sup>-1</sup>)]/[amount of immobilised Ti atoms on the sample (mol)].

### **Supporting References**

**S1.** T. Blasco, A. Corma, M. T. Navarro and J. P. Pariente, *J. Catal.*, 1995, **156**, 65–74.
